# Supplementary material for: Two alternate strategies for innate immunity to Epstein-Barr virus: One using NK cells and the other NK cells and γδ T cells
Source: PubMed Central journal article supplement — J Exp Med. 2017 Jun 5;214(6):1827–41. doi: 10.1084/jem.20161017 (PMC5460997; doi:10.1084/jem.20161017), 2017-06-05
Supplement: JEM_20161017_sm.pdf [file JEM_20161017_sm.pdf]

SUPPLEMENTAL MATERIAL

Djaoud et al., <https://doi.org/10.1084/jem.20161017>

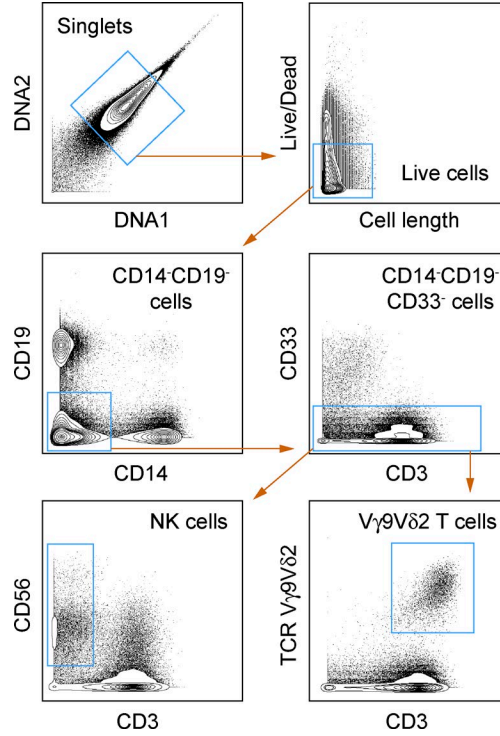

Figure S1. **Sequential gating strategy to identify NK cells and Vγ9Vδ2 T cells from unstimulated PBMCs.** NK cells were defined as CD14<sup>-</sup>CD19<sup>-</sup>CD33<sup>-</sup>CD3<sup>-</sup>CD56<sup>+</sup>, and Vγ9Vδ2 T cells were defined as CD14<sup>-</sup>CD19<sup>-</sup>CD33<sup>-</sup>CD3<sup>+</sup>TCRVγ9Vδ2<sup>+</sup>. For consistency, the same gating strategy was applied to identify NK cells and Vγ9Vδ2 T cells from 10-d cultures in which PBMCs were stimulated with Akata cells and IL2.

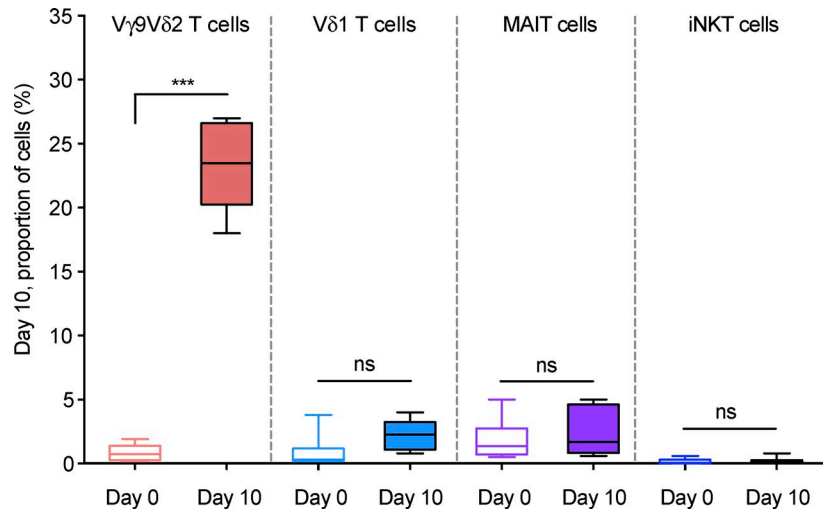

Figure S2. **V $\delta$ 1 T cells, MAIT cells, and iNKT cells do not significantly respond to EBV infection.** Boxes and whiskers represent the proportion of cells before (day 0, empty boxes) and after (day 10, filled boxes) 10-d culture of PBMCs from six group 1 donors with Akata cells and IL2. Statistical significance of the difference between experiment and control was assessed using ANOVA. (\*\*\*,  $P < 0.0001$ ; ns, nonsignificant).

Tables S1 and S2 are included as separate Excel files. Table S1 shows a mass cytometry antibody panel. Table S2 shows HLA-A, -B, and -C genotypes of donors 4–24.
